# Supplementary material
Source: publisher figshare collection journal article supplement (https://gsajournals.figshare.com/ndownloader/files/39471367)
Supplement: Supplementary file 1 [file 39471367]

==================================================
file name: oenMel.fasta             
sequences:           588
total length: 1036273591 bp  (1036215391 bp excl N/X-runs)
GC level:         42.01 %
bases masked:  123559781 bp ( 11.92 %)
==================================================
               number of      length   percentage
               elements*    occupied  of sequence
--------------------------------------------------
Retroelements       238014     84602438 bp    8.16 %
   SINEs:             9597      1633928 bp    0.16 %
   Penelope            229        28882 bp    0.00 %
   LINEs:           146730     41549595 bp    4.01 %
    CRE/SLACS            0            0 bp    0.00 %
     L2/CR1/Rex     143820     40622034 bp    3.92 %
     R1/LOA/Jockey     278       398560 bp    0.04 %
     R2/R4/NeSL       1881       190554 bp    0.02 %
     RTE/Bov-B         374       231788 bp    0.02 %
     L1/CIN4            70        16805 bp    0.00 %
   LTR elements:     81687     41418915 bp    4.00 %
     BEL/Pao             0            0 bp    0.00 %
     Ty1/Copia         185       117793 bp    0.01 %
     Gypsy/DIRS1      1373       733665 bp    0.07 %
       Retroviral    78827     40253657 bp    3.88 %

DNA transposons      19823      3264375 bp    0.32 %
   hobo-Activator     2605       440419 bp    0.04 %
   Tc1-IS630-Pogo      489        83242 bp    0.01 %
   En-Spm                0            0 bp    0.00 %
   MuDR-IS905            0            0 bp    0.00 %
   PiggyBac            225        32961 bp    0.00 %
   Tourist/Harbinger  5867       557813 bp    0.05 %
   Other (Mirage,        0            0 bp    0.00 %
    P-element, Transib)

Rolling-circles       2048       901254 bp    0.09 %

Unclassified:        40683     11430700 bp    1.10 %

Total interspersed repeats:    99297513 bp    9.58 %


Small RNA:            1946       239044 bp    0.02 %

Satellites:           7993      4305228 bp    0.42 %
Simple repeats:     278678     16037029 bp    1.55 %
Low complexity:      49969      2909180 bp    0.28 %
==================================================

* most repeats fragmented by insertions or deletions
  have been counted as one element
  Runs of >=20 X/Ns in query were excluded in % calcs


RepeatMasker Combined Database: Dfam_3.1, RepBase-20181026
                       
run with rmblastn version 2.10.0+
The query was compared to classified sequences in "bird_library_25Oct2020_oenMel_rm1.1.fasta"
